# Supplementary material for: Overexpression of TcNTPDase-1 Gene Increases Infectivity in Mice Infected with Trypanosoma cruzi
Source: MDPI journal article supplement (doi:10.3390/ijms232314661), 2022-11-24
Supplement: s1 [file s1]

**Supplemental Figures:**

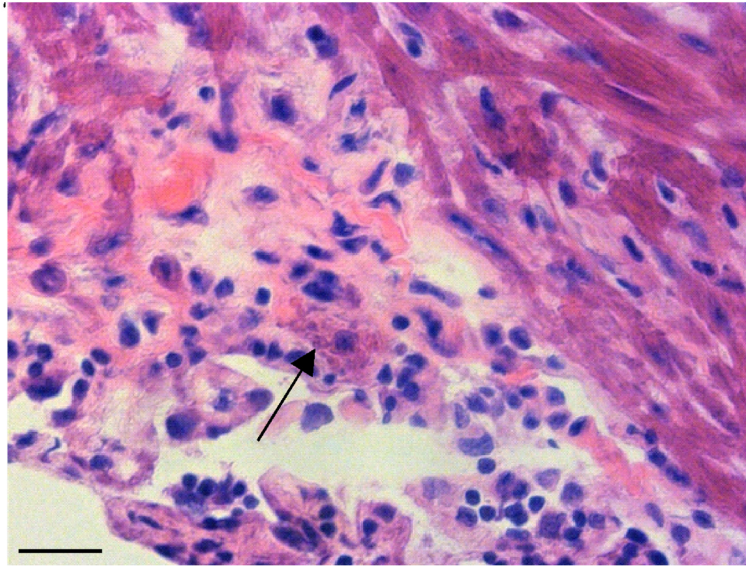

**Figure S1.** *Trypanosoma cruzi* infected cell in the cardiac tissue on WT group. Hematoxylin and eosin stained at 30° dpi. Arrow indicates the infected cell.
